# Supplementary material for: An Integrated Transcriptomics and Proteomics Analysis Implicates lncRNA MALAT1 in the Regulation of Lipid Metabolism
Source: PubMed Central journal article supplement — Mol Cell Proteomics. 2021 Aug 31;20:100141. doi: 10.1016/j.mcpro.2021.100141 (PMC8479834; doi:10.1016/j.mcpro.2021.100141), 2021-08-31
Supplement: mmc1.pdf [file mmc1.pdf]

## **Supplemental Information**

Title: An Integrated Transcriptomics and Proteomics Analysis Implicates lncRNA MALAT1  
in the Regulation of Lipid Metabolism

H. Wang et al.

Supplemental table S1. The siRNA sequences used for MALAT1 knockdown.

|               |            |                           |
|---------------|------------|---------------------------|
| <b>MALAT1</b> | siMALAT1-1 | GAGGTGTAAAGGGATTAT        |
|               | siMALAT1-2 | CACAGGGAAAGCGAGTGGTTGGTAA |

Supplemental table S2. List of the primer sequences used in the qRT-PCR experiments.

| <b>Primer name</b> | <b>Sequence (5'-3')</b> |
|--------------------|-------------------------|
| MALAT1 Forward     | CTCCCCACAAGCAACTTCTC    |
| MALAT1 Reverse     | TTCAACCCACCAAAGACCTC    |
| GAPDH Forward      | TGCACCACCAACTGCTTAGC    |
| GAPDH Reverse      | GGCATGGACTGTGGTCATGAG   |
| SCD Forward        | TTCCCGACGTGGCTTTTTCT    |
| SCD Reverse        | AGCCAGGTTTGTAGTACCTCC   |
| SREBF1 Forward     | GTCTCAGTCCCCTGGTCTCT    |
| SREBF1 Reverse     | CCGGTTGATAGGCAGCTTCT    |
| RAB14 Forward      | ATTATTGGGGACATGGGAGTAGG |
| RAB14 Reverse      | TAAATCGCTCCTGTCCTGCC    |
| PRKAB1 Forward     | GGGGGCGGAAAGGAAGTTTA    |
| PRKAB1 Reverse     | GCTGGTACTATGGGCTCGG     |
| PRKAG1 Forward     | TCGCTGCTATGACCTGATTCC   |
| PRKAG1 Reverse     | GAGCCCTCAGCACCAAAAA     |
| pre-SREBF1 Forward | TCTACAGGTAAGGGGGATGTGT  |
| pre-SREBF1 Reverse | ACCTCTACTCACATCACAGCA   |
| pre-SCD1 Forward   | GCGTGATTAGAGAGCGGAGT    |
| pre-SCD1 Reverse   | GGTGGTGGTGGTATAGGAGC    |
| pre-RAB14 Forward  | ACCATGGCAACTGCACCATA    |
| pre-RAB14 Reverse  | CTCAGTCCTGAAGTGGTACTGT  |
| pre-PRKAG1 Forward | AAAGGGATGGCGGGTTTCTG    |
| pre-PRKAG1 Reverse | AACTGGAACTCACCTGGCAT    |
| pre-PRKAB1 Forward | AACGGTGTTCGATGGACGG     |
| pre-PRKAB1 Reverse | ATATGTGAACACTCCCCAGGC   |

Supplemental table S3. List of the anti-sense probe sequences used for the isolation of MALAT1.

| Probe name | Sequence (5'-3')                                        |
|------------|---------------------------------------------------------|
| MALAT1-1   | GCTTAAGAGGGCAGGAGAGGCCAGTTGCGGGGCCCCAGTCC<br>TTACAGAA   |
| MALAT1-2   | GTGTTCTCTTGAGGGACAGTAGGTATAGTTTACCACCTTTTGA<br>AGGAAGA  |
| MALAT1-3   | ATCCTACCACTCCCAATTAATCTTTCCATTTTCGTCTGCGTTTA<br>GTAAAT  |
| MALAT1-4   | CCTGGACTCTTTTCCTATCTTCACCACGAACTGCTGCTTGCTC<br>GCTTGCT  |
| MALAT1-5   | GAGTAACTACCAGCCATTTCTCCAATGGACATCTCTCCACAG<br>ACCTCAA   |
| MALAT1-6   | TCAGGATCATTAAGCCACTTCCTTTGCTCTGCAGTTTCTATAGT<br>AGTTTT  |
| MALAT1-7   | ATTAAGA ACTCCACAGCTCTTAAAATAAGCACTTATCCCTA<br>ACATGCA   |
| MALAT1-8   | ATGCAATTCAAATCCTGAATGGCTTCATGAAGGATGAAATGC<br>CTCTGCA   |
| MALAT1-9   | ATCTATTCAATACTATTGTCCCATAACTGATCTGACTTTGTATGT<br>AAATA  |
| MALAT1-10  | TCAGCTCCGCTAAGATGCTAGCTTGGCCAAGTCTGTTATGTT<br>CACCTGA   |
| LacZ-1     | TTTCCAGTCACGACGTTGTAAAACGACGGCCAGTGAATCCG<br>TAATCATG   |
| LacZ-2     | AGTGGCAACATGGAAATCGCTGATTTGTGTAGTCGGTTTATGC<br>AGCAACG  |
| LacZ-3     | AGTGCAGGAGCTCGTTATCGCTATGACGGAACAGGTATTTCGC<br>TGGTCACT |

## Supplemental Figure S1

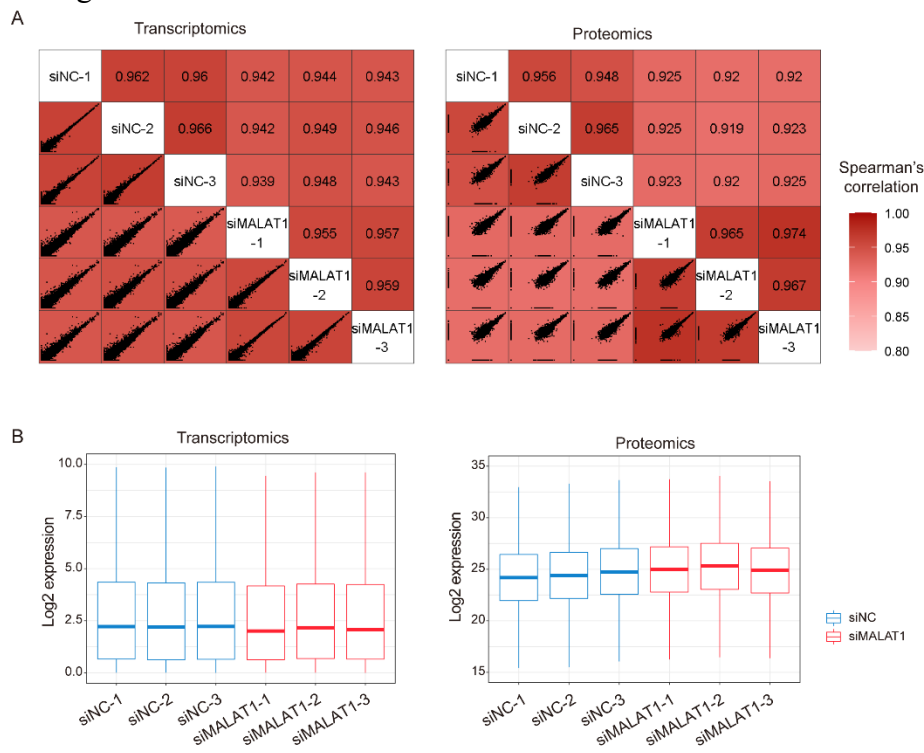

Supplemental Figure S1. Quality assessment of the transcriptome and proteome data. **A**, Scatter plots and Spearman's correlation coefficients of the transcriptome (left panel) and proteome (right panel) data. The top-right half of the panel represents the pairwise Spearman's correlation coefficients between samples, and the bottom-left half of the panel depicts the pairwise scatter plots from the same comparison. **B**, Boxplots showing the distribution of log<sub>2</sub>-transformed expression intensities from the transcriptome (left panel) and proteome data (right panel). In the box plots, the middle bars represent the median, and the boxes represent the interquartile range; bars extend to 1.5× the interquartile range.

## Supplemental Figure S2

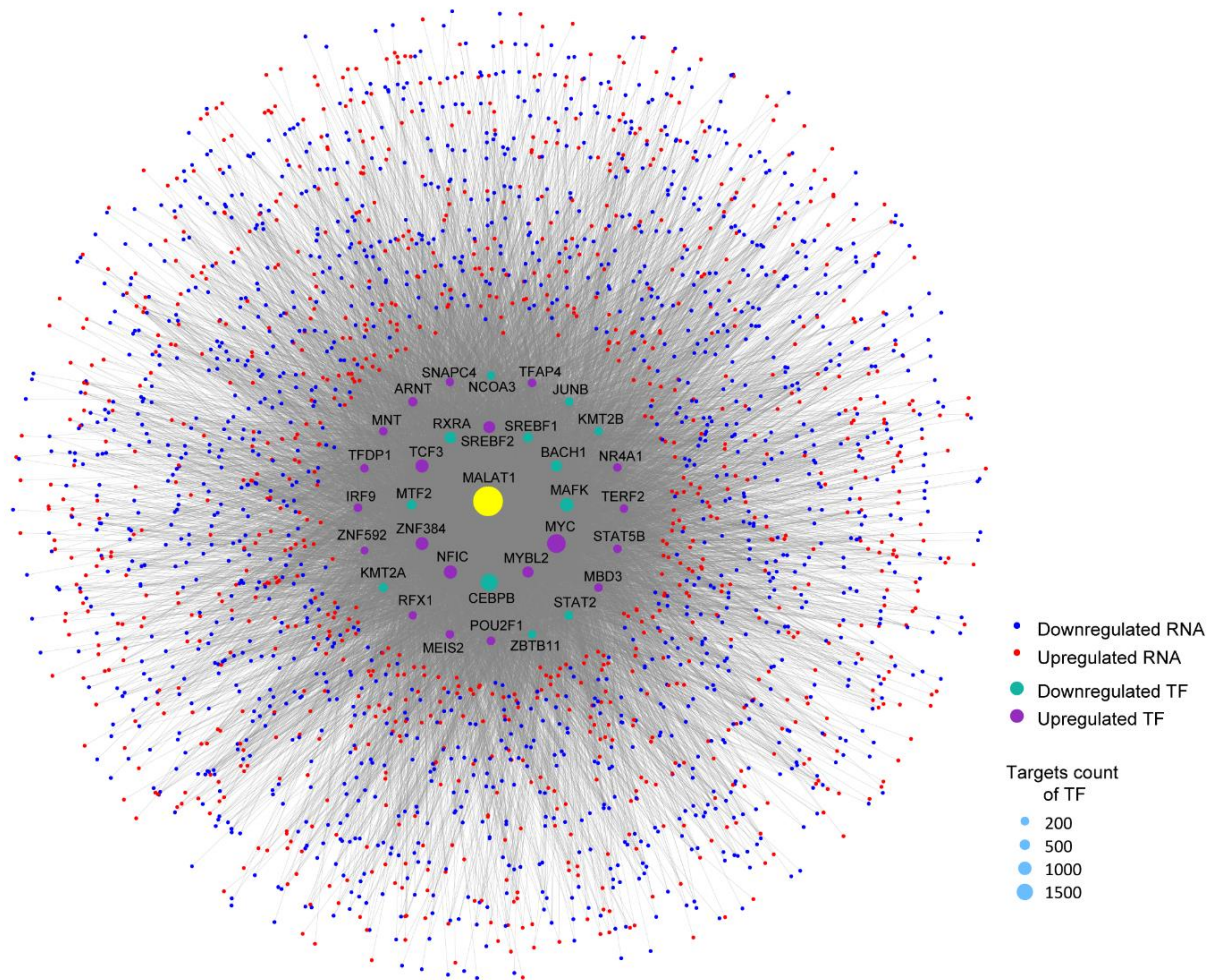

Supplemental Figure S2. The gene expression network potentially regulated by MALAT1. The regulatory information between TFs with altered expression and the target mRNAs was acquired from the ChEA3 ChIP-seq database (<https://maayanlab.cloud/chea3/>, ENCODE\_ChIP-seq, Literature\_ChIP-seq, ReMap\_ChIP-seq). The node size of TFs in the network represent the numbers of its targets. The network was constructed by Cytoscape (version: 3.8.0).

## Supplemental Figure S3

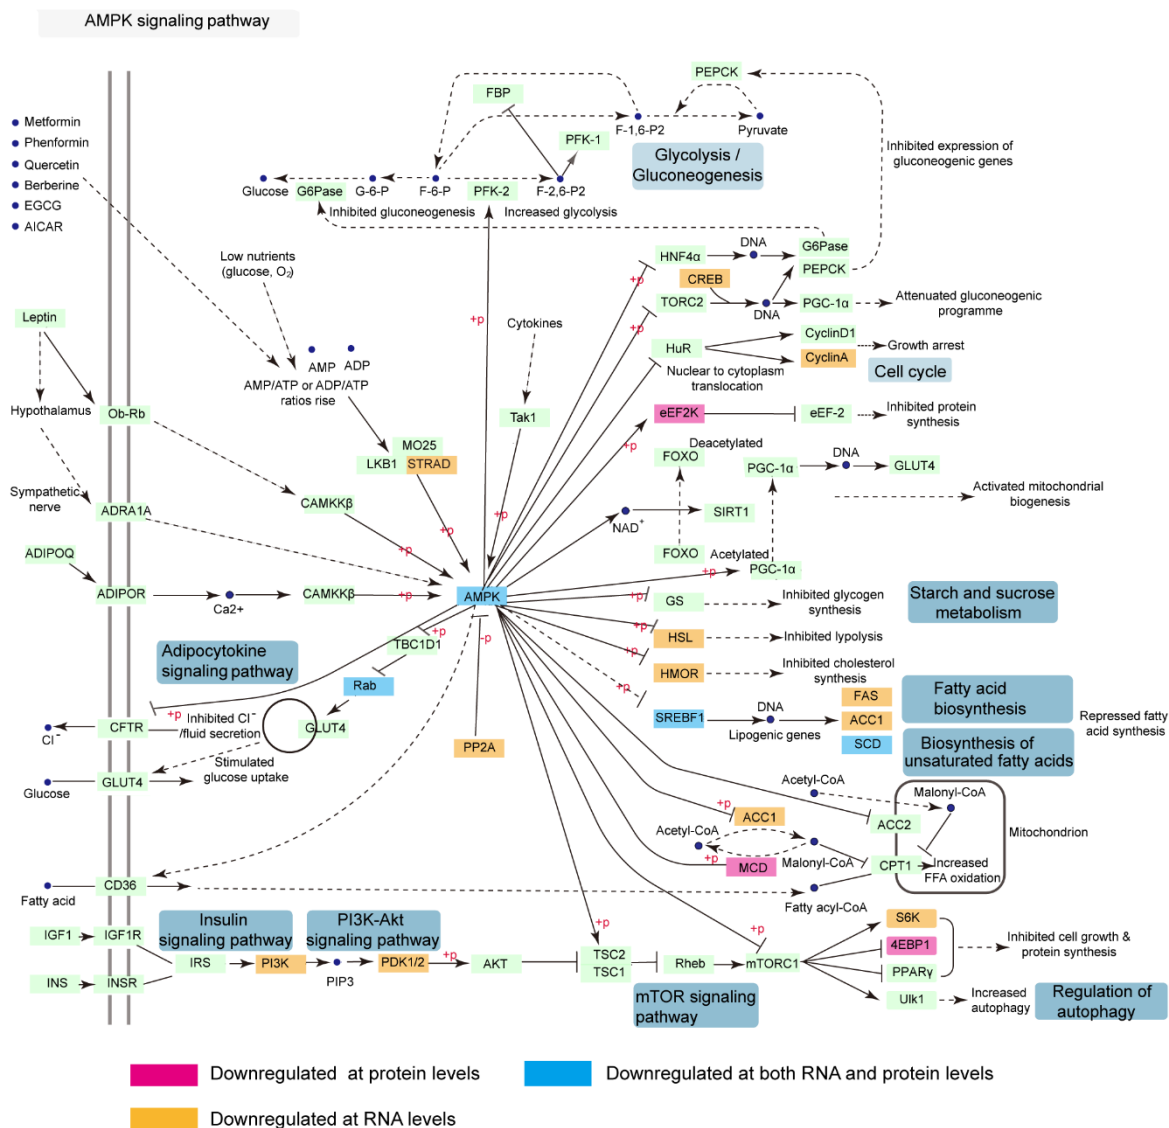

Supplemental Figure S3. The AMPK signaling pathway. Schematic diagram of the pathway was constructed from KEGG pathway database by using the KEGGscape (version: 0.9.0) application implemented in cytoscape (version: 3.8.1). Signaling molecules and enzymes with abundance changes at mRNA or protein levels induced by MALAT1 knockdown were indicated with different colors.

## Supplemental Figure S4

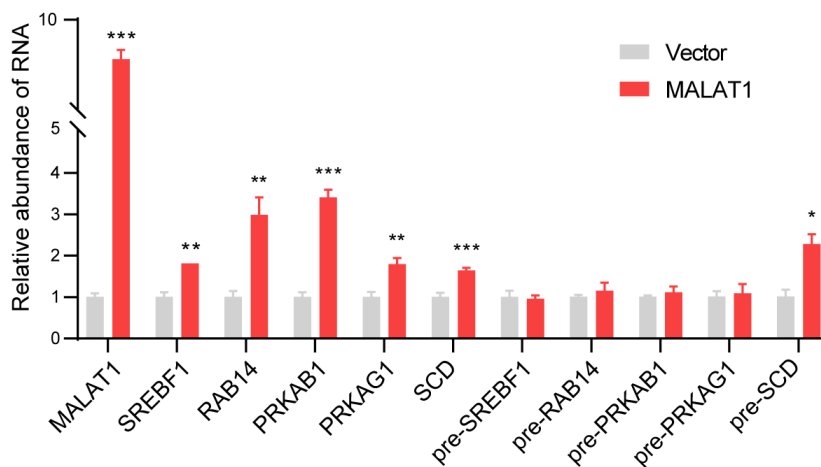

Supplemental Figure S4. Overexpression of MALAT1 elevated the mRNA levels of genes in the AMPK signaling and lipid metabolism pathways. Relative quantification of the mRNAs and the corresponding pre-mRNAs was examined by qRT-PCR. Data represent mean  $\pm$  s.d. of triplicate independent experiments (\* $P < 0.05$ , \*\* $P < 0.01$ , \*\*\* $P < 0.001$ , by two-sided Student's  $t$ -test).



## Supplemental Figure S5

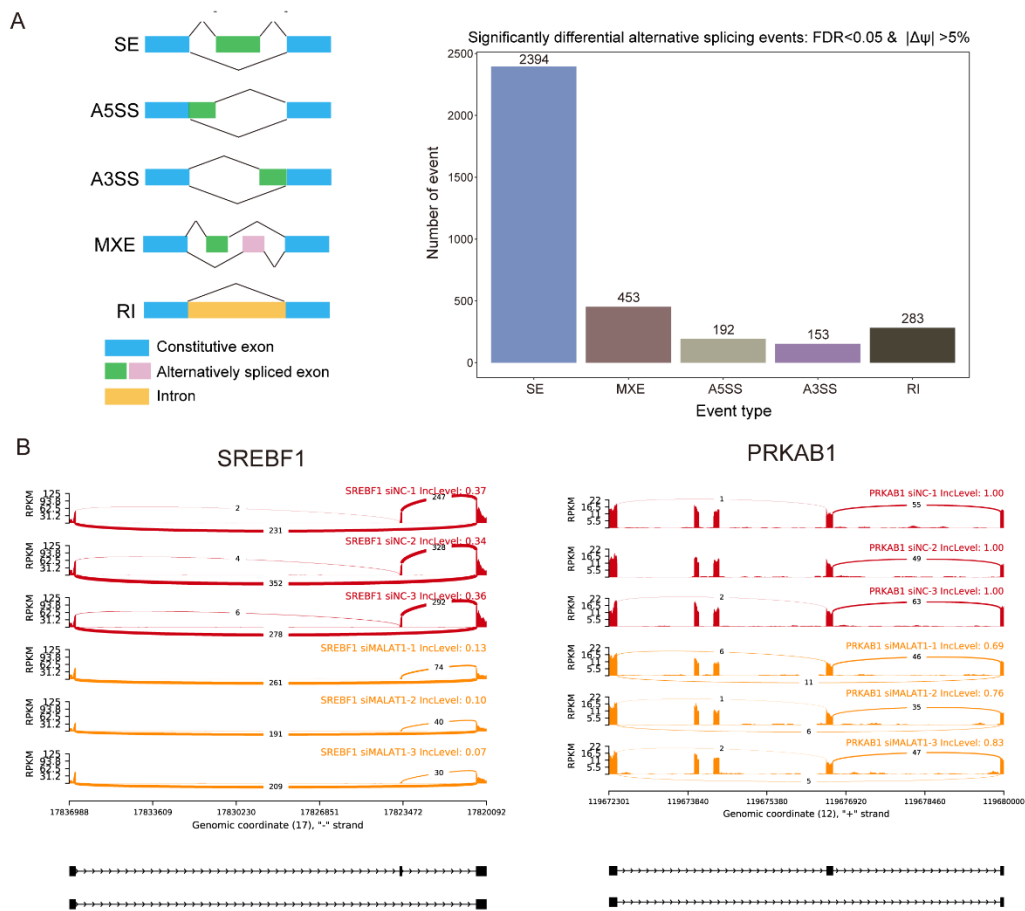

Supplemental Figure S5. Differential analysis of alternative splicing using the transcriptomics data. **A**, bar plot showing the numbers of significantly changed alternative splicing events in siMALAT1 compared to siNC cells. rMATS was employed to analyze all major types of alternative splicing patterns, including: skipped exon (SE), mutually exclusive exons (MXE), alternative 5' splice site (A5SS), alternative 3' splice site (A3SS) and retained intron (RI). **B**, Sashimi plots showing the differential SE events of SREBF1 and PRKAB1.
